# Supplementary material
Source: Springer Nature journal article supplement (https://www.springermedizin.de/resource/supplementary/12889_2012_5411_MOESM1_ESM.pdf/9495324)
Supplement: MOESM1 [file 9495324]

## QUANTITATIVE

### Hypothesis:

Evidence of counterintuitive findings from quantitative data: participants appear to walk or cycle in unsupportive conditions

### Expansion of sample:

Participants engaging in active travel despite reporting an unsupportive environment (at least three adverse conditions on route)

## QUALITATIVE

Analysis 1: inductive indexing/scoping of 5 participants who reported unsupportive conditions and who also took part in interviews; generation of master code list and themes

Analysis 2: deductive content analysis of the three themes with 15 participants who reported unsupportive conditions, walked or cycled and completed interviews
